# Supplementary material for: Getah Virus (Alphavirus): An Emerging, Spreading Zoonotic Virus
Source: MDPI journal article supplement (doi:10.3390/pathogens11080945), 2022-08-20
Supplement: s1 [file s1]

**Table S1.** GETV isolates from bloodsucking insects and vertebrate hosts. As of March 2022, 169 GETV strains had been identified. Virus sequences 128 are from GenBank, including 88 E2 genes and 40 non-E2 genes (C, E1, nspP1–4) . Information for 41 isolates is from published Chinese and English articles. A total of 113 strains were isolated from bloodsucking insect vectors, and the remaining 56 strains were isolated from animal specimens.

| Group | Strain                | Year | Country         | source                       |           | Source of information |             |           |
|-------|-----------------------|------|-----------------|------------------------------|-----------|-----------------------|-------------|-----------|
|       |                       |      |                 | blood-sucking<br>insects     | animals   | GenBank               |             | Reference |
|       |                       |      |                 |                              |           | E2 gene               | Not E2 gene |           |
| I     | MM2021                | 1955 | Malaysia        | <i>Cx. gelidus</i>           |           | AF339484*             |             |           |
| II    | GETV-SAGV             | 1956 | Japan           | mosquito                     |           | AB032553*             |             |           |
| II    | GETV-SAGV-Original    | 1956 | Japan           | mosquito                     |           | AF339483              |             |           |
| II    | GETV-SAGV-M 6-Mag 132 | 1956 | Japan           | mosquito                     |           | MW410934*             |             |           |
| IV    | LEIV 16275 Mag        | 2000 | Russia          | <i>Ae. sp.</i>               |           | EF631998*             |             |           |
| IV    | YN12031               | 2012 | China, Yunnan   | <i>Ar. subalbatus</i>        |           | KY434327*             |             |           |
| IV    | B254                  | 2012 | Malaysia, Johor | <i>Cx. fuscicephalus</i>     |           | LR990838*             |             |           |
| IV    | SW_Thailand           | 2017 | Thailand        |                              | Wild boar | LC534253*             |             |           |
| III   | M1                    | 1964 | China, Hainan   | <i>Cx. sp.</i>               |           | EU015061*             |             |           |
| III   | MI-110-C2             | 1978 | Japan           |                              | Horse     | LC079087*             |             |           |
| III   | MI-110-C1             | 1978 | Japan           |                              | Horse     | LC079086*             |             |           |
| III   | QIAG9303              | 1993 | South Korea     |                              | Pig       | KR081240              |             |           |
| III   | QIAG9302              | 1993 | South Korea     |                              | Pig       | KR081239              |             |           |
| III   | QIAG9301              | 1993 | South Korea     |                              | Pig       | KR081238              |             |           |
| III   | LEIV 17741 MPR        | 2000 | Mongolia        | <i>Cx. sp.</i>               |           | EF631999*             |             |           |
| III   | HB0234                | 2002 | China, Hebei    | <i>Cx. tritaeniorhynchus</i> |           | EU015062*             |             |           |
| III   | HB0215-3              | 2002 | China, Hebei    | <i>Cx. tritaeniorhynchus</i> |           | EU015065              |             |           |
| III   | South Korea           | 2004 | South Korea     |                              | Pig       | AY702913*             |             |           |
| III   | SH05-17               | 2005 | China, Shanghai | <i>Cx. tritaeniorhynchus</i> |           | EU015069              |             |           |
| III   | SH05-16               | 2005 | China, Shanghai | <i>Cx. tritaeniorhynchus</i> |           | EU015068              |             |           |

|     |               |      |                 |                              |           |           |
|-----|---------------|------|-----------------|------------------------------|-----------|-----------|
| III | SH05-15       | 2005 | China, Shanghai | <i>Cx. tritaeniorhynchus</i> |           | EU015067  |
| III | SH05-6        | 2005 | China, Shanghai | <i>Cx. tritaeniorhynchus</i> |           | EU015066  |
| III | YN0540        | 2005 | China, Yunnan   | <i>Ar. subalbatus</i>        |           | EU015063* |
| III | YN0542        | 2005 | China, Yunnan   | <i>Ar. subalbatus</i>        |           | EU015064  |
| III | Kochi/01/2005 | 2005 | Japan           |                              | Wild boar | AB859822* |
| III | GS10-2        | 2006 | China, Gansu    | <i>Ar. subalbatus</i>        |           | EU015070  |
| III | TC07180       | 2007 | China, Yunnan   | <i>Cx. pseudovishnui</i>     |           | KY450684  |
| III | LH07012       | 2007 | China, Yunnan   | <i>Cx. tritaeniorhynchus</i> |           | KY450685  |
| III | GZ0809        | 2008 | China, Guizhou  | <i>Ar. subalbatus</i>        |           | KY457545  |
| III | GZ0862        | 2008 | China, Guizhou  | <i>Ar. subalbatus</i>        |           | KY457546  |
| III | GZ0867        | 2008 | China, Guizhou  | <i>Ar. subalbatus</i>        |           | KY457547  |
| III | GZ0881        | 2008 | China, Guizhou  | <i>Ar. subalbatus</i>        |           | KY457548  |
| III | GZ0885        | 2008 | China, Guizhou  | <i>Ar. subalbatus</i>        |           | KY457549  |
| III | GZ0896        | 2008 | China, Guizhou  | <i>Ar. subalbatus</i>        |           | KY457550  |
| III | GZ08133       | 2008 | China, Guizhou  | <i>Ar. subalbatus</i>        |           | KY457551  |
| III | GZ08142       | 2008 | China, Guizhou  | <i>Cx. tritaeniorhynchus</i> |           | KY457552  |
| III | DY0824        | 2008 | China, Shandong | <i>Cx. tritaeniorhynchus</i> |           | KY434328  |
| III | DH10M1102     | 2010 | China, Yunnan   | <i>Cx. fuscocephala</i>      |           | KY450686  |
| III | DH10M1106     | 2010 | China, Yunnan   | <i>Cx. annulus</i>           |           | KY450687  |
| III | DH10M390      | 2010 | China, Yunnan   | <i>Cx. tritaeniorhynchus</i> |           | KY450688  |
| III | DH10M1105     | 2010 | China, Yunnan   | <i>An. Sinensis</i>          |           | KY450689  |
| III | HNJZ-S1       | 2011 | China, Henan    |                              | Pig       | KY363862* |
| III | 12-YJ020      | 2012 | China, Shanxi   | mosquito                     |           | KP216576  |
| III | SC1210        | 2012 | China, Sichuan  | <i>Ar. subalbatus</i>        |           | LC107870* |
| III | YN12042       | 2012 | China, Yunnan   | <i>Cx. tritaeniorhynchus</i> |           | KY450683* |
| III | 12IH26        | 2012 | Japan           | <i>Cx. tritaeniorhynchus</i> |           | LC152056* |

|     |             |      |                       |          |          |           |
|-----|-------------|------|-----------------------|----------|----------|-----------|
| III | 14-I-605-C2 | 2014 | Japan                 |          | Horse    | LC079089* |
| III | 14-I-605-C1 | 2014 | Japan                 |          | Horse    | LC079088* |
| III | HNJZ-S2     | 2015 | China, Henan          |          | Pig      | KY363863* |
| III | 15-I-1105   | 2015 | Japan                 |          | Pig      | LC212973* |
| III | 15-I-752    | 2015 | Japan                 |          | Horse    | LC212972* |
| III | GETV-V1     | 2016 | China, Henan          |          | Pig      | KY399029* |
| III | HNNY-2      | 2016 | China, Henan          |          | Pig      | MG865967* |
| III | HNNY-1      | 2016 | China, Henan          |          | Pig      | MG865966* |
| III | 16-I-676    | 2016 | Japan                 |          | Horse    | LC223132* |
| III | 16-I-674    | 2016 | Japan                 |          | Horse    | LC223131* |
| III | 16-I-599    | 2016 | Japan                 |          | Horse    | LC223130* |
| III | HNDZ1712-1  | 2017 | China, Hainan         | mosquito |          | ON828424* |
| III | HNPDS-2     | 2017 | China, Henan          |          | Pig      | MG865969* |
| III | HNPDS-1     | 2017 | China, Henan          |          | Pig      | MG865968* |
| III | AH9192      | 2017 | China, Anhui          |          | Pig      | MG865965* |
| III | HuN1        | 2017 | China, Hunan          |          | Pig      | MF741771* |
| III | JL1707      | 2017 | China, Jilin          | mosquito |          | MH722255* |
| III | JL17/08     | 2017 | China, Jilin          | mosquito |          | MG869691* |
| III | SD17/09     | 2017 | China, Shandong       |          | Blue fox | MH106780* |
| III | SC266       | 2018 | China, Sichuan        |          | Pig      | MN478487* |
| III | SC483       | 2018 | China, Sichuan        |          | Pig      | MN478486* |
| III | NMDK1813-1  | 2018 | China, Inner Mongolia | mosquito |          | MW512827* |
| III | JS18        | 2018 | China, Jiangsu        |          | Pig      | MT210319* |
| III | FJ201807-1  | 2018 | China, Fujian         |          | Pig      | MZ736799* |
| III | GDFS9       | 2018 | China, Guangdong      |          | Pig      | MT086509* |
| III | GDFS2       | 2018 | China, Guangdong      |          | Pig      | MT086508* |

|          |                              |      |                       |                              |                        |           |
|----------|------------------------------|------|-----------------------|------------------------------|------------------------|-----------|
| III      | GZ201808                     | 2018 | China, Guangdong      |                              | Horse                  | MK487997* |
| III      | GX201808                     | 2018 | China, Guangxi        |                              | Pig                    | MT269657* |
| III      | HB_A3_18-7E-HZ-ANS-Y-1-1     | 2018 | China, Hubei          | <i>An. sinensis</i>          |                        | MW246754  |
| III      | NM_JA_F2_18-8L-NH-Cxp-Y-1-1  | 2018 | China, Inner Mongolia | <i>Cx. pipiens</i>           |                        | MW246769* |
| III      | NM_JA_G4_18-8L-NH-Cxp-Y-2-4  | 2018 | China, Inner Mongolia | <i>Cx. pipiens</i>           |                        | MW246756  |
| III      | NM_JA_E12_18-8M-NH-Cxp-Y-3-1 | 2018 | China, Inner Mongolia | <i>Cx. pipiens</i>           |                        | MW246755  |
| III      | GS11-155                     | 2018 | China, Gansu          | <i>Cx. tritaeniorhynchus</i> |                        | ON828425* |
| III      | JL1808                       | 2018 | China, Jilin          |                              | cattle                 | MH722256* |
| III      | SC201807                     | 2018 | China, Sichuan        |                              | Pig                    | MK693225* |
| III      | SCrph328                     | 2018 | China, Sichuan        |                              | <i>Ailurus fulgens</i> | MZ357111* |
| III      | YN2018E2-1                   | 2018 | China, Yunnan         | mosquito                     |                        | MZ494498  |
| III      | YN2018E2-2                   | 2018 | China, Yunnan         | mosquito                     |                        | MZ494499  |
| III      | YN2018E2-3                   | 2018 | China, Yunnan         | mosquito                     |                        | MZ494500  |
| III      | GX1                          | 2019 | China, Guangxi        |                              | Pig                    | MZ736796* |
| III      | HeN202009-2                  | 2020 | China, Henan          |                              | Pig                    | MZ736801* |
| III      | SCrph129                     | 2020 | China, Sichuan        |                              | <i>Ailurus fulgens</i> | MZ357112* |
| subtotal | 88 strains                   |      |                       | 49 strains                   | 39 strains             |           |
|          | AHHB                         | 2016 | China, Anhui          |                              | Pig                    | MG817411  |
|          | JS_QH_G7_18-7L-QH-Cxt-5-4    | 2018 | China, Hainan         | <i>Cx. tritaeniorhynchus</i> |                        | MW246722  |
|          | XY0901                       | 2009 | China, Henan          | <i>Cx. tritaeniorhynchus</i> |                        | JN582180  |
|          | XY0904                       | 2009 | China, Henan          | <i>Cx. tritaeniorhynchus</i> |                        | JN582181  |
|          | HNGY                         | 2016 | China, Henan          |                              | Pig                    | MG817427  |
|          | HNKF                         | 2016 | China, Henan          |                              | Pig                    | MG817426  |
|          | HNXC                         | 2016 | China, Henan          |                              | Pig                    | MG817422  |

|                   |      |                 |                              |     |          |
|-------------------|------|-----------------|------------------------------|-----|----------|
| HNXY              | 2016 | China, Henan    |                              | Pig | MG817419 |
| HNBF-2            | 2016 | China, Henan    |                              | Pig | MG817418 |
| HNWG              | 2016 | China, Henan    |                              | Pig | MG817413 |
| HNZM              | 2016 | China, Henan    |                              | Pig | MG817412 |
| HNBF-1            | 2016 | China, Henan    |                              | Pig | MG817409 |
| HNHB              | 2016 | China, Henan    |                              | Pig | MG817408 |
| LN0636            | 2006 | China, Liaoning | <i>An. sp.</i>               |     | FJ217992 |
| Z39               | 2008 | China, Liaoning | <i>Cx. tritaeniorhynchus</i> |     | FJ897148 |
| Z18               | 2008 | China, Liaoning | <i>Cx. tritaeniorhynchus</i> |     | FJ897147 |
| Z12               | 2008 | China, Liaoning | <i>Cx. tritaeniorhynchus</i> |     | FJ897146 |
| B1                | 2008 | China, Liaoning | <i>Cx. tritaeniorhynchus</i> |     | FJ897145 |
| SD2014-1          | 2015 | China, Shandong |                              | Fox | KX034052 |
| YN08              | 2008 | China, Yunan    | <i>Ae. albopictus</i>        |     | JN578105 |
| SAVG_ML/Taiwan/02 | 2002 | China, Taiwan   |                              | Pig | DQ138299 |
| SAVG_Taiwan       | 2002 | China, Taiwan   | mosquito                     |     | AF242890 |
| A87-09            | 2009 | China, Yunan    | mosquito                     |     | KP900945 |
| A137-09           | 2009 | China, Yunan    | mosquito                     |     | KP900944 |
| A134-09           | 2009 | China, Yunan    | mosquito                     |     | KP900943 |
| A132-09           | 2009 | China, Yunan    | mosquito                     |     | KP900942 |
| A123-09           | 2009 | China, Yunan    | mosquito                     |     | KP900941 |
| YN2018NS3-2       | 2018 | China, Yunan    | mosquito                     |     | MZ494502 |
| YN2018NS3-1       | 2018 | China, Yunan    | mosquito                     |     | MZ494501 |
| GETV-B3           | 2018 | China, Yunan    | <i>Cx. tritaeniorhynchus</i> |     | MW030467 |
| GETV-C1           | 2018 | China, Yunan    | <i>Ae. aegypti</i>           |     | MW030466 |
| GETV-E1           | 2018 | China, Yunan    | <i>Cx. tritaeniorhynchus</i> |     | MW030465 |
| XJ-2017-08        | 2017 | China, Xinjiang |                              | Pig | OK626897 |

|            |            |                 |                              |            |          |
|------------|------------|-----------------|------------------------------|------------|----------|
| XJ-2018-06 | 2018       | China, Xinjiang |                              | Horse      | OK626898 |
| XJ-2019-06 | 2019       | China, Xinjiang |                              | Pig        | OK626899 |
| SAVG_31407 | 1956       | Japan           | mosquito                     |            | AF398379 |
| Miho2014   | 2014       | Japan           |                              | Horse      | LC012885 |
| Kor51010   | 2010       | South Korea     | <i>Ae. vexans nipponii</i>   |            | JN410945 |
| KorL915    | 2010       | South Korea     | <i>Ae. vexans nipponii</i>   |            | JN410944 |
| Jin-Ju     | 2010       | South Korea     | mosquito                     |            | JN410946 |
| subtotal   | 40 strains |                 | 24 strains                   | 16 strains |          |
| N544       | 1961       | Australia       | mosquito                     |            | [1]      |
| –          | 1966       | Cambodia        | <i>Cx. tritaeniorhynchus</i> |            | [1]      |
| XJ73       | 2016       | China, Xinjiang | <i>culicoides</i>            |            | [14]     |
| SZC30      | 2013       | China, Yunnan   | <i>culicoides</i>            |            | [15]     |
| Ph Ar 814  | 1977       | Philippines     | <i>Cx. vishnui</i>           |            | [16]     |
| An-380     | 1986       | Sri Lanka       | <i>C. gelidus</i>            |            | [17]     |
| An-457     | 1986       | Sri Lanka       | <i>Cx. tritaeniorhynchus</i> |            | [17]     |
| An-514     | 1986       | Sri Lanka       | <i>Cx. tritaeniorhynchus</i> |            | [17]     |
| K-348      | 1986       | Sri Lanka       | <i>Cx. tritaeniorhynchus</i> |            | [17]     |
| An-432     | 1986       | Sri Lanka       | <i>Cx. fusccephala</i>       |            | [17]     |
| A-833      | 1987       | Sri Lanka       | <i>Cx. tritaeniorhynchus</i> |            | [17]     |
| A-836      | 1987       | Sri Lanka       | <i>Cx. tritaeniorhynchus</i> |            | [17]     |
| A-890      | 1987       | Sri Lanka       | <i>Cx. tritaeniorhynchus</i> |            | [17]     |
| A-989      | 1987       | Sri Lanka       | <i>Cx. tritaeniorhynchus</i> |            | [17]     |
| –          | 1990       | India           |                              | Horse      | [6]      |
| GETV 1     | 2004       | Vietnam         | <i>An. agus</i>              |            | [18]     |
| GETV 2     | 2004       | Vietnam         | <i>An. vagus</i>             |            | [18]     |
| GETV 3     | 2004       | Vietnam         | <i>An. vagus</i>             |            | [18]     |

|          |             |      |         |                              |            |      |
|----------|-------------|------|---------|------------------------------|------------|------|
|          | GETV 4      | 2004 | Vietnam | <i>Cx. bitaeniorhynchus</i>  |            | [18] |
|          | GETV 5      | 2004 | Vietnam | <i>Cx. tritaeniorhynchus</i> |            | [18] |
|          | GETV 6      | 2004 | Vietnam | <i>Cx. tritaeniorhynchus</i> |            | [18] |
|          | GETV 7      | 2004 | Vietnam | <i>Cx. tritaeniorhynchus</i> |            | [18] |
|          | GETV 8      | 2004 | Vietnam | <i>Cx. tritaeniorhynchus</i> |            | [18] |
|          | GETV 9      | 2004 | Vietnam | <i>Cx. vishnui</i>           |            | [18] |
|          | GETV 10     | 2004 | Vietnam | <i>Cx. vishnui</i>           |            | [18] |
|          | GETV 11     | 2004 | Vietnam | <i>Cx. vishnui</i>           |            | [18] |
|          | GETV 12     | 2004 | Vietnam | <i>Cx. vishnui</i>           |            | [18] |
|          | GETV 13     | 2004 | Vietnam | <i>Cx. vishnui</i>           |            | [18] |
|          | GETV 14     | 2004 | Vietnam | <i>Cx. vishnui</i>           |            | [18] |
|          | GETV 15     | 2004 | Vietnam | <i>Ma. indiana</i>           |            | [18] |
|          | SAVG 1      | 2004 | Vietnam | <i>An. sinensis</i>          |            | [18] |
|          | SAVG 2      | 2004 | Vietnam | <i>An. vagus</i>             |            | [18] |
|          | SAVG 3      | 2004 | Vietnam | <i>An. vagus</i>             |            | [18] |
|          | SAVG 4      | 2004 | Vietnam | <i>An. spp.</i>              |            | [18] |
|          | SAVG 5      | 2004 | Vietnam | <i>Ar. subalbatus</i>        |            | [18] |
|          | SAVG 6      | 2004 | Vietnam | <i>Cx. gelidus</i>           |            | [18] |
|          | SAVG 7      | 2004 | Vietnam | <i>Cx. gelidus</i>           |            | [18] |
|          | SAVG 8      | 2004 | Vietnam | <i>Cx. tritaeniorhynchus</i> |            | [18] |
|          | SAVG 9      | 2004 | Vietnam | <i>Cx. tritaeniorhynchus</i> |            | [18] |
|          | SAVG 10     | 2004 | Vietnam | <i>Cx. vishnui subgroup</i>  |            | [18] |
|          | SAVG 11     | 2004 | Vietnam | <i>Ma. annulifera</i>        |            | [18] |
| subtotal | 41 strains  |      |         | 40 strains                   | 1 strains  |      |
| total    | 169 strains |      |         | 113 strains                  | 56 strains |      |

\* Complete genome sequence
